# Supplementary material
Source: PubMed Central journal article supplement (PMC5377501)
Supplement: AEM.03508-16_zam999117778s1.pdf [file AEM.03508-16_zam999117778s1.pdf]

## Supplemental Information

### Metagenomic and metatranscriptomic analyses reveal structure and dynamics of a dechlorinating community containing *Dehalococcoides mccartyi* and corrinoid-providing microorganisms under cobalamin-limited condition

#### Running title: High-throughput sequencing of dechlorinating communities

Yujie Men<sup>1,†,‡,\*</sup>, Ke Yu<sup>1,†,‡</sup>, Jacob Bælum<sup>2,†</sup>, Ying Gao<sup>1,3</sup>, Julien Tremblay<sup>4</sup>, Emmanuel Prestat<sup>2,†</sup>, Ben Stenuit<sup>1,†</sup>, Susannah G. Tringe<sup>5</sup>, Janet Jansson<sup>6</sup>, Tong Zhang<sup>7</sup>, Lisa Alvarez-Cohen<sup>1,2,\*</sup>

<sup>1</sup>Department of Civil and Environmental Engineering, University of California, Berkeley, CA, USA

<sup>2</sup>Earth Science Division, Lawrence Berkeley National Laboratory, Berkeley, CA, USA

<sup>3</sup>School of Environment, Tsinghua University, Beijing, China

<sup>4</sup>National Research Council Canada, Montreal, QC, Canada

<sup>5</sup>DOE Joint Genome Institute, Walnut Creek, CA, USA

<sup>6</sup>Pacific Northwest National Laboratory, Richland, WA, USA

<sup>7</sup>The University of Hong Kong, Hong Kong

\* Address correspondence to Yujie Men

3209 Newmark Civil Engineering Laboratory

205 N Mathews Ave, Urbana IL 61801

Email: ymen2@illinois.edu

Phone: (217) 244-8259

† Current addresses:

*Yujie Men*, Department of Civil and Environmental Engineering, University of Illinois at Urbana-Champaign, Urbana, IL 61801;

*Ke Yu*, Peking University at Shenzhen, China;

*Jacob Bælum*, Chr Hansen A/S, Hørsholm, Denmark;

*Emmanuel Prestat*, Biostatistics & Bioinformatics at QIAGEN, Marseille Area, France;

*Ben Stenuit*, Earth and Life Institute, Catholic University of Louvain, Louvain-la-Neuve,  
Belgium;

‡ The two authors contributed equally to this study.

## **Supplemental methods**

### **1. Library preparation for RNA sequencing**

#### *Structural RNA removal and mRNA enrichment*

The purified total RNA was subjected to first strand cDNA synthesis using biotinylated universal 16S and 23S rRNA probes (1) and SuperScript® II reverse transcription (RT) system (Invitrogen, Life Technologies, Grand Island, NY) according to the manufacturer's instructions. A mixture of 2  $\mu$ L dNTP (10 mM each), 2  $\mu$ L biotinylated universal 16S primer mix (2.5 mM each), 2  $\mu$ L biotinylated universal 23S primer mix (2.5 mM each), 1  $\mu$ L SUPERaseIn RNase inhibitor (20U/ $\mu$ L), together with 8  $\mu$ L RNA sample (100 ng total) was denatured at 65 °C for 3 min and cooled on ice for 2 min. Then, the reaction mix was amended with 4  $\mu$ L 5X First-Strand buffer and 1  $\mu$ L (200 U) SuperScript II reverse transcriptase and incubated at 42 °C for 50 min.) Dynabeads® MyOne™ Streptavidin C1 magnetic beads (Invitrogen) were then used to capture the structural RNA from the above RT mix. (A 1.5-mL microcentrifuge tube containing 20  $\mu$ L suspension of beads was put on a magnetic stand for 1 min, the supernatant was then discarded. The beads were washed by 20  $\mu$ L of solution A (DEPC-treated 0.1 M NaOH and DEPC-treated 0.05 M NaCl, filter sterilized), B (DEPC-treated 0.1 M NaCl, filter sterilized) and 1X First-Strand buffer, respectively. The washed beads were resuspended into 10  $\mu$ L 1X First-Strand buffer.) A mixture of 5  $\mu$ L washed beads were added into the 20  $\mu$ L RT mix, and incubated at room temperature for 15 min. The beads were captured on a magnetic stand and the supernatant was transferred into another tube, with another 5  $\mu$ L of washed beads added for a 30 min-incubation at room temperature. The beads were captured and the supernatant was transferred into a new tube. The collected beads were resuspended in 10  $\mu$ L 1X First-Strand buffer, and the

supernatant was separated from the beads and combined with the previous ones, resulting in a total of 40  $\mu$ L enriched mRNA solution.

#### *Double stranded cDNA synthesis for linear amplification of mRNA*

First stranded cDNA was first synthesized using random hexamer. 1  $\mu$ L primer (1  $\mu$ g/ $\mu$ L), 1  $\mu$ L dNTPs (10 mM each), and 1  $\mu$ L (200 U) of SuperScript II reverse transcriptase were added into the 40  $\mu$ L enriched mRNA solution and hybridized at 25 °C for 2 min, followed by incubation at 42 °C for 50 min. The reaction was then inactivated at 70 °C for 10 min.

The second strand was synthesized using NEBNext mRNA Second Strand Synthesis Module (New England Biolabs, Inc., Ipswich, WA) according to the manufacturer's instructions. The synthesized double stranded cDNA was purified and eluted into 10  $\mu$ L nuclease-free water using MinElute PCR purification kit (Qiagen, Valencia, CA, USA) according to the manufacturer's instructions.

#### *Linear amplification*

T7 amplification requires addition of the T7 promoter to DNA fragments through the ligation of a T7-incorporated adapter. This enables T7 RNA polymerase-mediated transcription in an in vitro reaction, which amplifies the template in a linear rather than an exponential manner (2). The resulting RNA fragments are subsequently converted to cDNA, in which the representation of different DNA fragments is highly similar to that of the original samples (2). The entire procedure includes steps of end repair, "A" tailing, adapter ligation, size selection, linear amplification, and final double stranded cDNA synthesis. (The details of each step are described in supplementary information).

The purified and quantified ds cDNA was blunted and phosphorylated using End-It DNA End-repair Kit (Epicentre, Madison, WI) according to the manufacturer's instructions. An

adenine was added to the 3'-end of DNA fragments using Klenow fragment (New England Biolabs) according to the manufacturer's instructions. The adapter A (containing P5 primer) and adapter B (containing T7 promoter and P7 primer) for Illumina sequencing were then ligated onto the DNA fragments using Ligalast rapid DNA ligation system (Promega, Madison, WI) according to the manufacturer's instructions). The 400-500 bp DNA fragments (including the adapters) shown on the E-gel system (Invitrogen) were excised and purified using QIAquick Gel Extraction Kit following the manufacturer's instructions. The adapter-ligated and size-selected DNA fragments were then linearly transcribed into RNA using MEGA short script T7 kit (Ambion, Life Technologies, Grand Island, NY) according to the manufacturer's instructions. The transcribed RNA was purified using RNeasy MinElute cleanup kit (Qiagen) following the manufacturer's instructions, and then reverse transcribed into double stranded cDNA using P5 primer (first strand cDNA synthesis) and P7 (second strand cDNA synthesis) primer according to the protocols described by others (2).

## **2. High throughput sequencing data analysis**

The high throughput sequencing data were analyzed according to steps shown in Fig. S2. The following describes details of the major steps.

### *De novo assembly and ORF prediction*

The raw DNA reads were first trimmed to 100 bp and filtered using criteria that all of the nucleotides in one read have a quality score equal or above 20. The trimmed and quality filtered reads from both HiTCEB12 and HiTCE samples were then submitted for de novo assembly by CLC genomics workbench version 6 (CLC bio, Boston, MA), using a kmer value of 63 and a minimum contig length of 1 kbp. The assembled contigs were submitted to Metagenmark server (3) for ORF/gene prediction.

### *Bin-genome construction and annotation*

The difference in enrichment conditions of HiTCEB12 (with exogenous cobalamin) and HiTCE (without exogenous cobalamin) may result in shifts of microbial population abundances. A sequence-composition-independent, differential coverage binning method developed by others (4) was modified and applied to reconstruct the bin-genomes from the metagenomic datasets. Briefly, the coverage of each contig was calculated by mapping the reads after quality control against the contig sequence with a minimum similarity of 95% over 100% of the read length. Binning contigs into microbial population genomes were carried out by first plotting the coverage estimates of the two enrichments against each other for all contigs. The contigs clustered by differential coverage binning were further binned by tetranucleotide frequency and then extracted as bin-genomes.

The taxonomic assignment of the predicted ORFs was made by MEGAN5 (5) using the output file of BLASTx against the NCBI non-redundant protein sequence database (nr). The functional annotation of the predicted ORFs was assigned according to SEED subsystems database through MG-RAST, with a cut-off e-value of  $10^{-5}$ .

#### *Metatranscriptomic analysis*

A rapid rRNA filter using DUK, an efficient kmer matching tool developed by JGI (<https://sourceforge.net/projects/duk/>) was applied to separate rRNA reads from the metatranscriptomic sequence pool. The non-rRNA reads were analyzed using modified Tophat and Cufflinks packages (6). In general, the RNA fragments were mapped against the predicted ORF/gene sequences. RPKM (Reads Per Kilobase pair transcript per Million total reads mapped) values were calculated using Cuffdiff, a part of Cufflinks package. Transcripts detected under both conditions with 5-fold difference in RPKM values were considered to be significantly differentially expressed, and were subjected to subsequent analyses. In order to investigate the gene regulation at a single-cell level, RPKM values normalized to one specific bin-genome (i.e.

reads per kilobase pair transcript per million reads mapped in one bin-genome) were also calculated using Bowtie2 alignment.

## Supplemental Figures and Tables

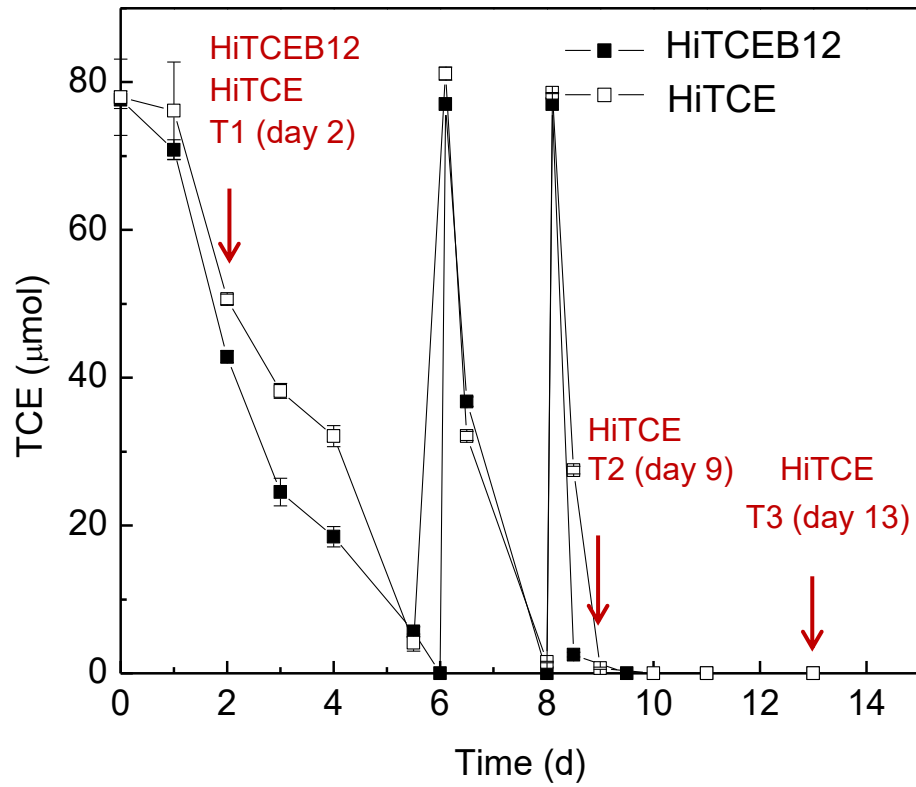

Figure S1. TCE degradation during a 13-day incubation (TCE was re-amended on day 6 and 8; red arrows indicate the time points at which samples were taken for metatranscriptomic sequencing)



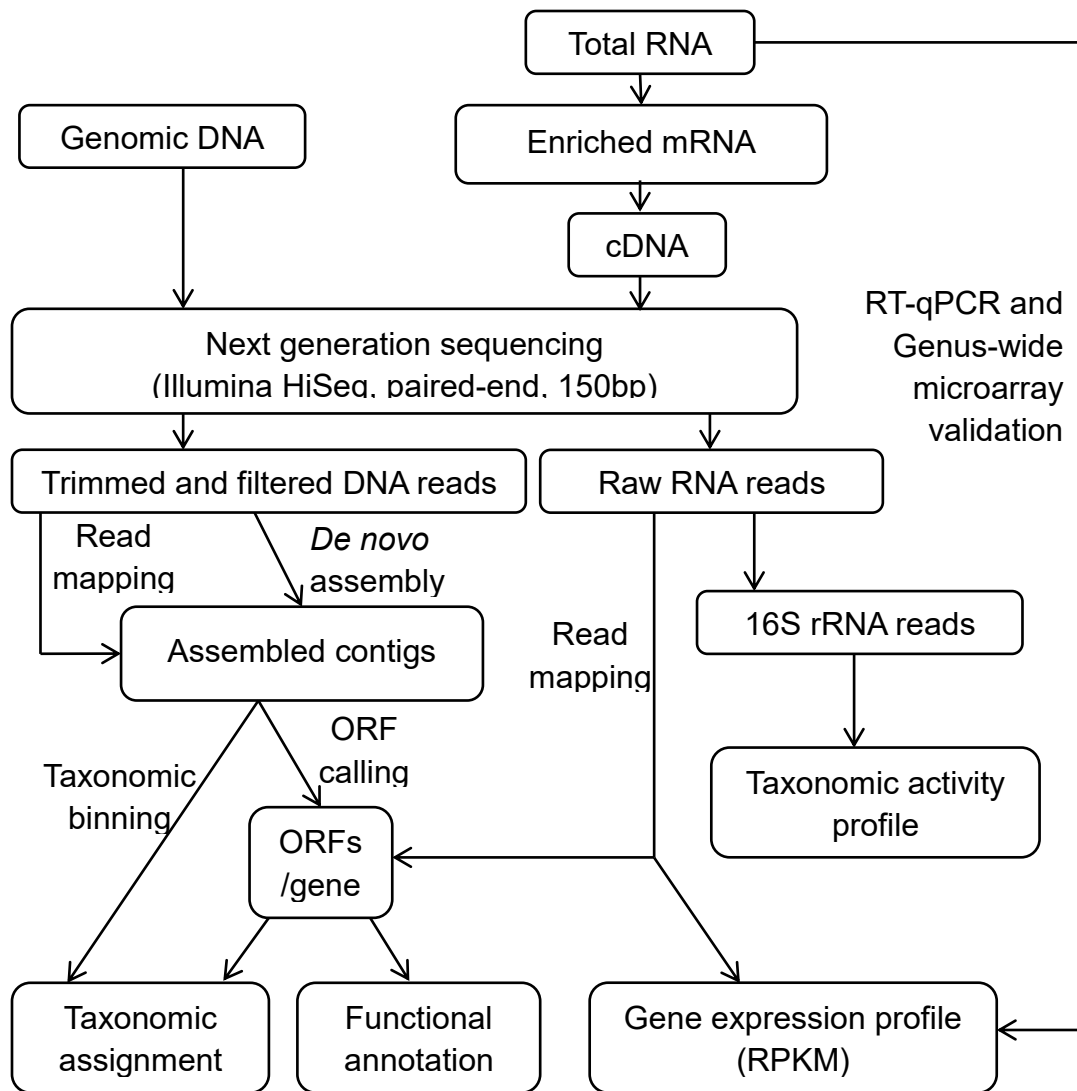

Figure S2. Schematic workflow of metagenomic and metatranscriptomic analysis. (ORF: open reading frame; RPKM: reads per kilobase pair of transcript per million reads mapped)

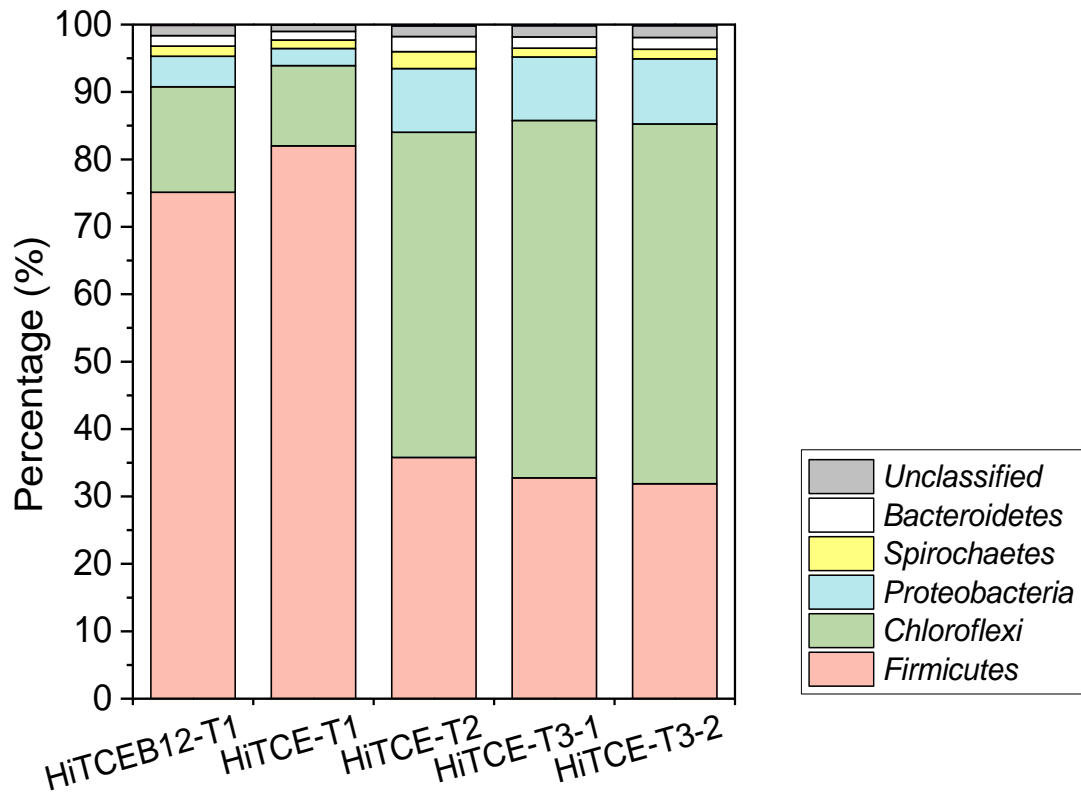

Figure S3. 16S rRNA distribution (at Phylum level) in metatranscriptomes (HiTCE-T3-1 and HiTCE-T3-2 are replicates).

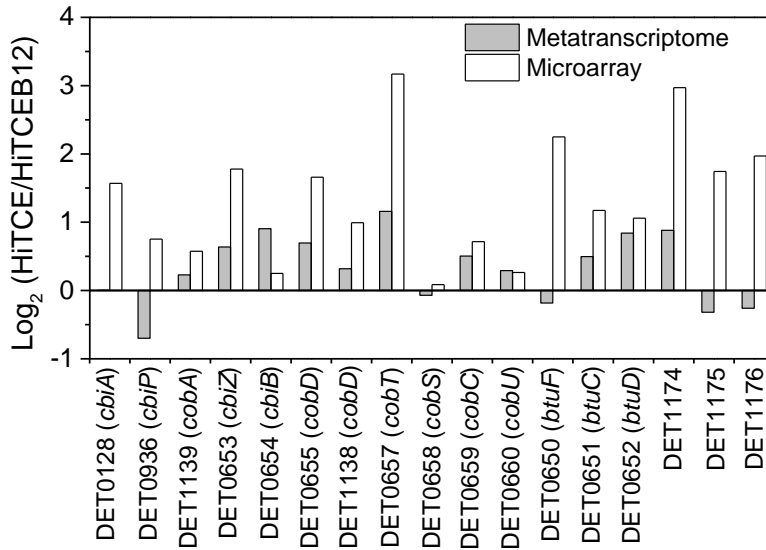

Figure S4. Differential expression of B<sub>12</sub>-related genes in *Dehalococcoides* bin-genome at T1 by metatranscriptome and *Dehalococcoides* genus-wide microarray.

Table S1 Quantitative PCR primers targeting genes involved in cobalamin biosynthesis

| Cobalamin biosynthesis enzymes |                                                                          | Gene ID | Primers (5'→ 3')                                            |
|--------------------------------|--------------------------------------------------------------------------|---------|-------------------------------------------------------------|
| CobA                           | uroporphyrin-III C-methyltransferase                                     | 947     | F440: AAGATCCAACCAAGGGCGAG<br>R571: CCGGACGGCCATTTTCAATC    |
| CysG                           | precorrin-2 dehydrogenase/siroheme synthase                              | 944     | F282: TGGGCGGGTTTGTATTCA<br>R392: TTGCCGGCTGTAGAAACAGT      |
| CbiK                           | cobalt chelatase                                                         | 1227    | F376: ACGGGGCAAGAAAATCAACC<br>R519: GAGTGCTGCATAGGCGGTAT    |
| CbiL                           | precorrin-2 C20-methyltransferase                                        | 6488    | F483: TCCAGAAGAGTTGCGTGTCA<br>R667: CACCGCGGAGACTGTCTAAA    |
| CbiH                           | precorrin-3B C17-methyltransferase                                       | 6491    | F176: TTGCTGTGGTTTCAAGTGGC<br>R308: GATGCTCCTACCGCACTGAT    |
| CbiF                           | precorrin-4 C11-methyltransferase                                        | 6489    | F129: ATTTGCCAAACAGGGTGCTG<br>R254: CTCGGGTCTCCCCTATGAAC    |
| CbiG                           | cobalamin biosynthesis protein                                           | 6490    | F540: TGTTAGAACC GCGACTGAGC<br>R654: CGAATCCACGGTCAGCTCTT   |
| CbiD                           | cobalt-precorrin-6A synthase                                             | 6485    | F735: ATACAACCTTCCCGCTGAGG<br>R906: CCTGGCATCTGCCATACGAT    |
| CbiJ                           | precorrin-6x reductase                                                   | 6492    | F531: CGCCATGCAAGGTCCATTTT<br>R636: ATCACTACCGCCAAGGTTGC    |
| CbiT                           | precorrin-6B (C15)-methyltransferase                                     | 6487    | F207: AGAAGAAGGCGTTTCGCTTGA<br>R314: GCTTGCGGTAAATCGCTCAG   |
| CbiE                           | precorrin-7 (C5)-methyltransferase                                       | N.D.    | N/A                                                         |
| CbiC                           | Precorrin-8x methylmutase                                                | 6493    | F176: AGGCTGGATGCCAAGCTTTA<br>R307: TGCCAGGGTCTGCGATTAAG    |
| CbiA                           | cobyrinic acid a,c-diamide synthase                                      | 6494    | F591: TACAGAGCATGTTGCCGAGG<br>R697: ATAAAGGCGGGG CAGTTTGA   |
| CobA                           | cob(I)alamin adenosyltransferase                                         | 5467    | F306: ACGCATTCCCAACGGTATT<br>R423: GGTACGCTTGAGGGTGACAA     |
| CbiP                           | cobyric acid synthase                                                    | 6496    | F1308: TGGCTTGGTAATGGGCACTT<br>R1416: TGTGCCGAGTGGTGTTAGAC  |
| CbiB/<br>CobD                  | cobalamin biosynthesis protein                                           | 6497    | F244: ATCGCAGTATGGGTTGGTGG<br>R370: CCTTATAGCGTGGCTGCTCA    |
| CobU                           | adenosylcobinamide-phosphate guanylyltransferase                         | 6495    | F406: GGCATGAGCATCGTACCTGA<br>R526: CTGGGATTCCGCTGACAAC     |
| CobT                           | nicotinate-nucleotide dimethylbenzimidazole-P phosphoribosyl transferase | 5484    | F659: GCTGTGTTGGCGGTTTTGAT<br>R787: CATTGATCTTGGCCGCACAC    |
| CobC                           | alpha-ribazole-5'-P phosphatase                                          | 6501    | F171: TAGAGCCTACCATACGGCGG<br>R269: CCTTCCCATTCCCAAAGGA     |
| CobS_1                         | cobalamin 5'-phosphate synthase                                          | 5485    | F86: GTTGGTCACCGGAGTCCTTT<br>R211: GGACGGGTACATCATTGCCA     |
| CobS_2                         | cobalamin 5'-phosphate synthase                                          | 6498    | F463: TTAGGCCGCTTTGCTATGGT<br>R635: ACCGCAATACAAATGGCAGC    |
| CbiZ                           | adenosylcobinamide amidohydrolase                                        | 1215    | F710: ACGGCTTATCGCCCAATCAA<br>R879: GGTCAC TAAGGCAGGCAGTT   |
| RpoB                           | RNA polymerase beta subunit                                              | 103     | F1775: TCTCGCCTAAGCAGGTCGTA<br>R1911: AACAAATTGGAGCCTGCGTTC |
| TceA                           | Reductive dehalogenase                                                   | 9272    | F: ATCCAGATTATGACCCTGGTGAA<br>R: GCGGCATATATTAGGGCATCTT     |

N.D.: not detected; N/A: not available

Table S3 Presence of anaerobic cobalamin biosynthesis genes in bingenomes and the corresponding transcripts in the metatranscriptomes

| Gene                  | Corresponding enzymes                                                    | Bingenomes                    |                      |                        |                        |
|-----------------------|--------------------------------------------------------------------------|-------------------------------|----------------------|------------------------|------------------------|
|                       |                                                                          | <i>Veillonellaceae</i>        | <i>Desulfovibrio</i> | <i>Sedimentibacter</i> | <i>Dehalococcoides</i> |
|                       |                                                                          | (presence of gene/transcript) |                      |                        |                        |
| <i>cobA</i>           | uroporphyrin-III C-methyltransferase                                     | +/-                           | +/-                  | +/-                    | -                      |
| <i>cysG</i>           | precorrin-2 dehydrogenase/siroheme synthase                              | <b>+/+</b>                    | +/-                  | +/-                    | -                      |
| <i>cbiK</i>           | cobalt chelatase                                                         | +/-                           | +/-                  | +/-                    | -                      |
| <i>cbiL</i>           | precorrin-2 C20-methyltransferase                                        | +/-                           | +/-                  | +/-                    | -                      |
| <i>cbiH</i>           | precorrin-3B C17-methyltransferase                                       | +/-                           | +/-                  | +/-                    | -                      |
| <i>cbiF</i>           | precorrin-4 C11-methyltransferase                                        | +/-                           | +/-                  | +/-                    | -                      |
| <i>cbiG</i>           | cobalamin biosynthesis protein                                           | +/-                           | +/-                  | +/-                    | -                      |
| <i>cbiD</i>           | cobalt-precorrin-6A synthase                                             | +/-                           | +/-                  | +/-                    | -                      |
| <i>cbiJ</i>           | precorrin-6x reductase                                                   | +/-                           | -                    | +/-                    | -                      |
| <i>cbiT</i>           | precorrin-6B (C15)-methyltransferase                                     | +/-                           | -                    | -                      | -                      |
| <i>cbiE</i>           | precorrin-7 (C5)-methyltransferase                                       | -                             | +/-                  | +/-                    | -                      |
| <i>cbiC</i>           | Precorin-8x methylmutase                                                 | +/-                           | +/-                  | +/-                    | -                      |
| <i>cbiA</i>           | cobyric acid a,c-diamide synthase                                        | +/-                           | +/-                  | +/-                    | <b>+/+</b>             |
| <i>cobA</i>           | cob(I)alamin adenosyltransferase                                         | +/-                           | +/-                  | +/-                    | <b>+/+</b>             |
| <i>cbiP</i>           | cobyric acid synthase                                                    | +/-                           | +/-                  | +/-                    | <b>+/+</b>             |
| <i>cbiB/<br/>cobD</i> | cobalamin biosynthesis protein                                           | +/-                           | +/-                  | +/-                    | <b>+/+</b>             |
| <i>cobU</i>           | adenosylcobinamide-phosphate guanylyltransferase                         | +/-                           | +/-                  | +/-                    | <b>+/+</b>             |
| <i>cobT</i>           | nicotinate-nucleotide dimethylbenzimidazole-P phosphoribosyl transferase | +/-                           | -                    | -                      | <b>+/+</b>             |
| <i>cobC</i>           | alpha-ribazole-5'-P phosphatase                                          | +/-                           | +/-                  | +/-                    | <b>+/+</b>             |
| <i>cobS</i>           | cobalamin 5'-phosphate synthase                                          | <b>+/+*</b>                   | +/-                  | +/-                    | <b>+/+</b>             |
| <i>cbiZ</i>           | adenosylcobinamide amidohydrolase                                        | +/-                           | -                    | -                      | <b>+/+</b>             |

\*Transcripts of one out of two *cobS* genes were detected in the metatranscriptome.

## References

1. Stewart FJ, Ottesen EA, DeLong EF. 2010. Development and quantitative analyses of a universal rRNA-subtraction protocol for microbial metatranscriptomics. *ISME J* 4:896-907.
2. Hoeymakers WA, Bartfai R, Francoijs KJ, Stunnenberg HG. 2011. Linear amplification for deep sequencing. *Nat Protoc* 6:1026-1036.
3. Zhu W, Lomsadze A, Borodovsky M. 2010. Ab initio gene identification in metagenomic sequences. *Nucleic Acids Res* 38:e132.
4. Albertsen M, Hugenholtz P, Skarshewski A, Nielsen KL, Tyson GW, Nielsen PH. 2013. Genome sequences of rare, uncultured bacteria obtained by differential coverage binning of multiple metagenomes. *Nat Biotechnol* 31:533-538.
5. Huson DH, Auch AF, Qi J, Schuster SC. 2007. MEGAN analysis of metagenomic data. *Genome Res* 17:377-386.
6. Trapnell C, Roberts A, Goff L, Pertea G, Kim D, Kelley DR, Pimentel H, Salzberg SL, Rinn JL, Pachter L. 2012. Differential gene and transcript expression analysis of RNA-seq experiments with TopHat and Cufflinks. *Nat Protoc* 7:562-578.
